# Supplementary material for: Host Age Is a Systemic Regulator of Gene Expression Impacting Cancer Progression
Source: Oxford University Press journal article supplement (doi:10.1158/0008-5472.can-14-1053), 2015-03-02
Supplement: 00085472can141053-sup-129688_1_supp_2689666_nd0qs4.doc [file 00085472can141053-sup-129688_1_supp_2689666_nd0qs4.doc]

| **IPA Canonical Pathways** | **p-value** | | | | | |
| --- | --- | --- | --- | --- | --- | --- |
| **O vs M** | **O vs Y** | **O vs A** | **M vs Y** | **M vs A** | **Y vs A** |
| ***Apoptosis Signaling*** | ***0.00026*** | ***0.00013*** | ***0.00275*** | --- | --- | --- |
| fMLP Signaling in Neutrophils | 0.00048 | 0.00029 | --- | --- | --- | --- |
| Remodeling of Epithelial Adherens Junctions | 0.00025 | --- | --- | --- | 0.00019 | 0.00004 |
| PI3K/AKT Signaling | --- | 0.00030 | --- | 0.00051 | --- | 0.00016 |
| Huntington's Disease Signaling | 0.00005 | --- | --- | --- | 0.00219 | --- |
| Prostate Cancer Signaling | --- | 0.00026 | --- | --- | --- | 0.00129 |
| Inosine-5'-phosphate Biosynthesis II | --- | 0.00010 | --- | --- | --- | 0.00126 |
| Lipid Antigen Presentation by CD1 | --- | --- | --- | 0.00447 | 0.00141 | --- |
| Gap Junction Signaling | 0.00046 | --- | --- | --- | --- | --- |
| CREB Signaling in Neurons | --- | --- | 0.00269 | --- | --- | --- |
| Ephrin B Signaling | --- | --- | 0.00014 | --- | --- | --- |
| Ephrin Receptor Signaling | --- | --- | 0.00115 | --- | --- | --- |
| Role of NFAT in Regulation of the Immune Response | --- | --- | 0.00209 | --- | --- | --- |
| 14-3-3-mediated Signaling | --- | --- | --- | 0.00269 | --- | --- |
| p53 Signaling | --- | --- | --- | 0.00631 | --- | --- |
| Protein Kinase A Signaling | --- | --- | --- | 0.00331 | --- |  |
| Breast Cancer Regulation by Stathmin1 | --- | --- | --- | --- | 0.00087 | --- |
| Granzyme B Signaling | --- | --- | --- | --- | 0.00282 | --- |
| Clathrin-mediated Endocytosis Signaling | --- | --- | --- | --- | --- | 0.00091 |

**Supplemental Table 3.** Top 5 IPA canonical pathways for each group. Significance between experimental data sets was determined through a Fisher’s exact test to calculate p-values. Apoptosis signaling canonical pathway (bolded and italic) was shown to be present in the top 5 canonical pathways for all old aged mice comparisons to all age groups.
